# Supplementary material for: Whole Exome Sequencing Identifies Genes Associated With Non-Obstructive Azoospermia
Source: Front Genet. 2022 Apr 13;13:872179. doi: 10.3389/fgene.2022.872179 (PMC9043847; doi:10.3389/fgene.2022.872179)
Supplement: Supplementary file 2 [file Table3.XLSX]

## Sheet: Sheet1
Table S3. The RVAS test results.
Genes	P.value	Normalized Expression - testis	Odds Ratio
A2ML1	0.440777	1.3	0
AACS	0.697405	9.7	0
AADACL4	0.148247	1.4	0
AAMDC	0.697405	14.4	0
AAMP	0.0296245	50.9	Not estimable
AARS	0.697405	12.2	0
AARS2	0.697405	12.9	0
AARSD1	0.277496	58.4	3.73208
AASDH	1	8.2	1.24105
AATF	0.0268446	8.7	Not estimable
ABCA10	0.429633	1.6	1.37365
ABCA13	0.272277	4.2	0.65506
ABCA2	0.697405	3	0
ABCA3	0.0268446	7.2	Not estimable
ABCA5	0.697405	9	0
ABCA6	1	5	0.930189
ABCA7	0.033111	1.6	5.6087
ABCA8	0.29517	15.8	3.73208
ABCA9	0.697405	10.9	0
ABCB1	0.697405	1.3	0
ABCB10	0.697405	4	0
ABCB5	0.129982	2.6	3.73552
ABCB6	0.697405	19.5	0
ABCB8	0.0268446	13.6	Not estimable
ABCB9	0.693306	21.3	0
ABCC10	0.440326	8.5	0
ABCC11	1	3.4	1.24121
ABCC12	0.346143	13.4	1.65743
ABCC3	0.134419	1	3.73552
ABCC8	0.435043	1.1	0
ABCD1	0.305303	24	0
ABCD4	0.691632	15.7	0
ABCG2	0.168775	1.9	2.13356
ABCG4	0.691038	7.2	0
ABHD1	0.13483	58.4	2.80492
ABHD10	0.697405	12.6	0
ABHD12	0.0268446	7.6	Not estimable
ABHD12B	0.113485	1.2	3.73552
ABHD14A-ACY1	0.239069	2.2	0.649898
ABHD15	0.697405	1.4	0
ABHD16B	1	9	1.24105
ABHD5	0.0268446	8.1	Not estimable
ABHD6	0.689979	3.1	0
ABI3BP	0.697405	12.3	0
ABLIM1	0.468743	17.2	0
ABO	0.4422	2	0
ABR	0.690316	3.8	0
ABTB1	0.445726	5.9	0
ACAA1	0.0304749	4.4	Not estimable
ACACA	0.433445	5.5	0
ACACB	0.306512	1.6	0
ACAD10	1	12	1.01521
ACAD11	1	5.3	1.86307
ACAD8	0.689655	9.2	0
ACADM	0.685312	8.5	0
ACADSB	1	2.9	1.86307
ACADVL	0.291346	11.5	3.73208
ACAP1	0.697405	1.4	0
ACAP3	0.686315	3.1	0
ACAT1	0.0314553	14.2	Not estimable
ACAT2	0.0268446	6.6	Not estimable
ACCSL	0.437778	2	0
ACE	1	32.6	1.86307
ACER2	0.688894	1.3	0
ACLY	0.235245	20.7	0
ACOT13	1	19.8	1.24242
ACOT8	0.0297838	12.8	Not estimable
ACOX2	0.697405	4	0
ACOX3	0.436495	5	1.59957
ACOXL	0.367015	4.6	2.48866
ACP2	0.697405	14.6	0
ACP6	0.178653	8.2	0
ACPP	0.439701	1	0
ACR	0.424634	106.3	0.823077
ACSBG2	0.697405	71.3	0
ACSF2	0.0308305	4.5	Not estimable
ACSF3	0.287212	11.2	3.73208
ACSM1	0.0268446	4.5	Not estimable
ACSM5	0.439301	1	0
ACSS3	0.697405	4	0
ACTL10	0.43995	46.3	0
ACTL8	0.0268446	23.6	Not estimable
ACTR1B	0.697405	10.1	0
ACTR5	1	17.8	1.86415
ACTR8	0.435456	27.5	0
ACTRT2	0.440567	60.2	0
ACVR1	0.294486	8.8	3.73208
ACY1	0.194148	1.5	0
ACYP2	0.68542	6.5	0
ADAD2	0.223333	68.1	0
ADAL	0.44409	12.5	0
ADAM15	1	8.3	1.86742
ADAM17	0.697405	17.4	0
ADAM18	0.709642	42.7	1.39747
ADAM2	1	50.6	1.49118
ADAM20	0.697405	18.7	0
ADAM29	0.139494	38.2	0
ADAM30	0.697405	30	0
ADAM32	0.439957	47	0
ADAM33	1	5.4	1.24121
ADAM7	0.41171	6.8	1.87405
ADAM8	0.59009	2.3	0.530981
ADAMTS12	0.306341	5	0
ADAMTS13	0.697405	3.8	0
ADAMTS20	1	2.3	1.24105
ADAMTS7	0.697405	3.5	0
ADAMTS9	0.697405	3.1	0
ADAMTSL1	0.443019	2.3	0
ADAMTSL4	0.00749814	3.3	Not estimable
ADAT1	0.695058	51.8	0
ADAT3	0.697405	5.5	0
ADCK2	0.196267	7.6	0
ADCY2	.	3.6	15.776
ADCY4	0.306422	2.6	0
ADCY7	0.283876	2.1	3.73208
ADCY9	0.697405	4.4	0
ADGB	0.697405	30.6	0
ADGRV1	0.469522	1.1	0
ADH5	0.689815	27.2	0
ADHFE1	0.0268446	3.2	Not estimable
ADM	0.454812	11.6	1.60879
ADO	0.697405	36.1	0
ADORA3	0.689497	1.1	0
ADPRHL1	0.433416	1.3	1.86742
ADRA1D	0.697405	1.5	0
ADRA2B	0.697405	2.6	0
ADSSL1	0.139806	3.4	7.49242
AEBP1	0.446889	30.6	0
AEN	0.135693	14.3	3.74242
AFF1	0.685749	6.7	0
AFF4	0.697405	17.6	0
AFG3L2	0.697405	8.9	0
AFMID	0.0486855	6.2	7.49242
AGAP3	0.692772	7	0
AGAP4	0.69123	5.6	0
AGAP5	0.394976	7.5	1.24079
AGAP6	0.00838205	7.2	0.107227
AGBL2	0.270193	34	0.370603
AGBL3	0.697405	18.7	0
AGBL5	0.697405	91.6	0
AGFG2	0.689655	6.8	0
AGK	0.697405	12.9	0
AGMO	0.234296	1.8	2.48866
AGPAT2	0.442013	5.2	0
AGR3	0.291646	1	3.73208
AGRN	0.445101	7.5	0
AHCY	0.0346336	33.3	Not estimable
AHI1	0.691038	29.2	0
AHNAK2	0.541192	3.2	0.495482
AK4	0.684579	6	0
AK7	0.304136	17.6	0
AK8	1	15.6	0.743396
AKAP9	0.686667	6.9	0
AKIP1	0.697405	22.1	0
AKNAD1	1	12.1	0.890769
AKR1A1	1	10.5	1.86415
AKR1C1	1	5.2	0.929924
AKR1C2	1	2.3	1.24105
AKR1C3	0.171815	3.2	2.13242
AKR1E2	0.690316	35	0
AKR7A2	0.280459	21.6	3.73208
AKT1S1	0.697405	13.5	0
ALDH16A1	.	4.5	0.362745
ALDH18A1	0.443263	8.4	0
ALDH1B1	0.438642	7.8	0
ALDH1L1	0.0331381	4.9	Not estimable
ALDH3A2	0.697405	9.8	0
ALDH3B1	1	2.9	0
ALDH7A1	0.287357	4.9	3.73208
ALDOA	0.683114	11.6	0
ALDOC	0.693598	4.6	0
ALG10B	0.690316	8.9	0
ALG13	0.0268446	19	Not estimable
ALG14	0.688054	10	0
ALG2	0.69463	12.6	0
ALG3	0.296652	20.8	3.73208
ALG5	0.697405	7.2	0
ALG8	0.697405	38.9	0
ALG9	1	25	0
ALK	0.697405	4.9	0
ALKBH1	0.14461	9.9	0
ALKBH3	1	17.3	0.930346
ALLC	0.0499293	34.9	7.47607
ALMS1	0.0312576	23.2	Not estimable
ALOX15	0.0268446	1.4	Not estimable
ALOX15B	0.691038	1	0
ALPK1	0.147018	4.2	0.284949
ALPPL2	0.690316	1.6	0
ALS2	0.697405	6.1	0
ALS2CR12	0.241095	29.9	0
AMACR	.	2.1	0.515625
AMDHD1	1	6.2	1.86415
AMDHD2	0.691428	25.7	0
AMER1	0.697405	1.4	0
AMH	0.693598	35.7	0
AMHR2	0.0268446	15.2	Not estimable
AMIGO3	0.697405	8.7	0
AMOTL1	0.689497	7.1	0
AMPD3	0.697405	1.4	0
AMZ2	0.697405	77.2	0
ANAPC1	0.697405	6.5	0
ANAPC7	0.691428	36.3	0
ANGEL1	0.0268446	27.5	Not estimable
ANGPTL1	0.68542	24.7	0
ANGPTL5	0.37314	6.2	1.4244
ANGPTL6	0.429507	1.3	0
ANK3	0.695567	3.4	0
ANKAR	0.443703	9	0
ANKDD1A	0.697405	8.6	0
ANKFN1	0.697405	3.6	0
ANKK1	0.228476	1	0
ANKLE1	0.697405	1	0
ANKRD13A	0.292511	45.8	3.73208
ANKRD13C	0.693598	8.1	0
ANKRD18B	0.299728	26.9	0
ANKRD20A2	0.692289	7.6	0
ANKRD20A3	0.0767688	2	0
ANKRD26	0.697405	9.7	0
ANKRD27	0.23161	22.6	0
ANKRD30A	0.697405	17.8	0
ANKRD30B	0.0109722	42.2	11.2424
ANKRD31	0.448336	13.2	0
ANKRD36	0.175434	13.3	0.827451
ANKRD36B	0.697405	7.5	0
ANKRD40	0.0268446	6.4	Not estimable
ANKRD42	0.43301	41.8	0
ANKRD50	0.0307158	16.8	Not estimable
ANKRD53	0.430398	19.9	0
ANKRD65	0.289893	3.1	3.73208
ANKRD7	0.124661	184.1	3.73552
ANKS3	0.697405	8	0
ANKS6	0.435846	6.1	0
ANKZF1	1	8.7	1.24151
ANO1	0.697405	7.6	0
ANO2	0.308133	13.4	0
ANO6	0.697405	10.4	0
ANXA3	0.697405	1.8	0
ANXA7	0.291112	11.7	3.73208
ANXA9	0.684579	3.6	0
AOAH	1	1.4	0.743719
AOC2	0.407919	6.5	0.464218
AOC3	0.30739	16.2	0
AOX1	0.00773683	10.8	Not estimable
AP1G2	0.289657	4.5	3.73208
AP1M1	0.0268446	40.7	Not estimable
AP4B1	0.692062	10.5	0
AP4M1	0.290658	26.3	3.73208
AP5M1	0.687659	9.6	0
APBA3	0.301608	6	0
APBB2	0.697405	8.8	0
APC2	0.684889	1.8	0
APEH	0.697405	22.3	0
APIP	0.0108767	9.7	11.2814
APOBEC3B	0.438876	2	0
APOBEC3C	0.441816	45.6	0
APOBEC3D	0.695567	3	0
APOBEC3G	0.297564	15.6	3.73208
APOBEC3H	0.686315	4	0
APOC1	0.688894	1	0
APOD	0.697405	32	0
APOL1	0.438013	6.1	0
APOL5	1	2.6	1.24121
APOL6	0.692289	2.5	0
APPL1	0.440344	10.5	0
AQP10	0.441186	1.3	0
ARAP2	1	5.9	1.86307
ARAP3	0.439303	3.6	0
ARFGAP1	0.437575	19.9	0
ARFGEF1	0.686548	27.1	0
ARG2	0.697405	1.9	0
ARGFX	0.688606	2.2	0
ARHGAP10	0.697405	11.2	0
ARHGAP11A	0.691038	6.4	0
ARHGAP19	0.291375	20.1	3.73208
ARHGAP21	0.304964	10.4	0
ARHGAP22	0.447119	4.6	0
ARHGAP23	0.697405	5.2	0
ARHGAP28	0.689041	39.4	0
ARHGAP33	0.686667	18.2	0
ARHGAP39	0.223048	12.8	2.49242
ARHGAP40	0.687789	1.2	0
ARHGAP5	0.689655	20.4	0
ARHGAP8	1	3	1.86307
ARHGEF10	0.30262	19.1	0
ARHGEF15	0.0268446	2.7	Not estimable
ARHGEF17	0.0268446	4.8	Not estimable
ARHGEF25	0.689497	4.6	0
ARHGEF33	1	10.1	1.86415
ARHGEF37	0.0486228	4.8	7.49242
ARHGEF39	1	2.9	1.24151
ARHGEF40	0.290354	4.7	3.73208
ARHGEF5	0.145009	1.4	0.510787
ARID1B	0.697405	10.7	0
ARID3A	0.697405	17.8	0
ARID3B	0.689041	19.5	0
ARIH2OS	0.305927	5.4	0
ARL13A	0.29565	16.6	3.73208
ARL16	0.697405	18.2	0
ARL6IP1	0.697405	28.1	0
ARL9	0.690668	12.6	0
ARMC1	0.697405	10	0
ARMC10	0.381243	14.1	1.86742
ARMC3	0.697405	25.7	0
ARMC4	0.303566	22	3.73208
ARMC5	0.0324082	6	Not estimable
ARMC6	0.304668	17.1	0
ARMC9	0.346236	11	1.65743
ARRDC2	0.697405	3.2	0
ARSB	0.69123	4.1	0
ARSD	1	5.2	0.317235
ARSI	0.0268446	1.1	Not estimable
ART3	0.287437	42.6	3.73208
ASAH1	0.697405	8.2	0
ASB13	0.687921	4.7	0
ASB15	0.0254014	1.1	2.18474
ASB8	0.697405	8.5	0
ASCC3	0.697405	11.7	0
ASIC3	0.434156	10.2	0
ASIC4	0.233389	1.6	0
ASL	0.691632	2.1	0
ASPDH	0.697405	1.1	0
ASPHD1	0.683114	4.3	0
ASPHD2	0.697405	2.7	0
ASPM	0.692062	6.3	0
ASPN	0.697405	6.7	0
ASPSCR1	0.188833	16.9	0
ASRGL1	0.695058	57.6	0
ASTE1	0.434997	12.1	0
ATAD3A	0.697405	12.7	0
ATAD3B	0.697405	9.3	0
ATAT1	0.0496292	7	0
ATF1	0.0320839	9.3	Not estimable
ATF3	0.692289	10.7	0
ATG16L2	0.433408	2.6	0
ATG2B	0.684579	6.5	0
ATG4C	0.438038	8.9	0
ATG9A	0.697405	47	0
ATG9B	0.525589	2.2	0.529919
ATIC	0.697405	15	0
ATM	0.0340789	6.1	Not estimable
ATN1	0.0308305	8.8	Not estimable
ATP10D	0.279141	3.9	3.73208
ATP11C	0.688606	7.9	0
ATP13A2	0.0268446	6.2	Not estimable
ATP13A3	0.689815	8.8	0
ATP1A4	1	35.8	1.86415
ATP1B3	0.297746	21.1	3.74242
ATP5S	0.697405	19.8	0
ATP6V0E2	0.697405	3.2	0
ATP6V1C1	0.691428	13	0
ATP6V1F	0.429529	41.9	0
ATP6V1G1	0.697405	58.3	0
ATP6V1H	1	10.8	1.24242
ATP7B	0.448517	7.1	0
ATP8B2	0.697405	12.7	0
ATP8B3	0.0961627	55.8	0.218342
ATPAF1	0.442666	13.4	0
ATR	0.436948	15.3	0
ATRNL1	0.697405	13	0
ATXN2	0.342979	30.8	0
ATXN3	0.0230751	14.8	0.732888
ATXN7	0.439894	14.6	0
ATXN7L1	0.697405	20.8	0
ATXN7L2	0.697405	8.8	0
AUNIP	0.29497	35.3	3.73208
AURKA	0.0355279	41.1	Not estimable
AURKAIP1	0.697405	73.8	0
AURKB	0.69463	1.2	0
AURKC	0.295451	72	3.74242
AUTS2	0.697405	10	0
AVL9	0.690316	10	0
AVPR1A	0.671044	1.8	1.24304
AXDND1	0.433854	18	0
AXIN1	0.689497	9.6	0
AZGP1	0.697405	1.2	0
B3GALNT1	0.697405	6.2	0
B3GALNT2	0.438265	5.8	0
B3GALT6	0.697405	8.4	0
B3GLCT	0.697405	4.9	0
B3GNTL1	0.43864	4	0
B4GALNT1	0.697405	1.6	0
B4GALNT3	0.305192	8	0
B4GALT4	0.0268446	5.8	Not estimable
B4GAT1	0.438663	4.4	0
BAG3	0.0268446	8.1	Not estimable
BAG6	0.0312576	101.8	Not estimable
BAHCC1	0.689815	4.4	0
BAIAP2	0.29165	9.2	3.74242
BAIAP2L2	0.233422	2.2	0
BAIAP3	0.293583	7.6	3.73208
BANK1	0.689655	1.3	0
BARD1	0.697405	9.5	0
BBIP1	0.693306	70.3	0
BBS1	0.697405	11	0
BBS2	0.0268446	16.9	Not estimable
BBS4	0.30773	25.7	0
BBS7	0.690668	12.2	0
BCAN	0.697405	2	0
BCAR1	0.690145	17.3	0
BCAS1	0.697405	2.5	0
BCAS2	0.443702	21.2	0
BCAS3	0.697405	20.2	0
BCDIN3D	0.300411	5.3	3.74242
BCHE	1	1.8	1.24105
BCKDHB	0.688606	10	0
BCKDK	0.697405	11.2	0
BCLAF1	0.0439121	16.7	3.74242
BCO2	0.126124	2.4	2.80151
BCR	0.546634	9.6	0.759164
BDH1	0.235	1.8	0
BDH2	0.156759	7.2	0.433846
BDP1	0.505165	4.9	0
BEAN1	0.689041	3.1	0
BEGAIN	0.697405	2.6	0
BEND2	0.684681	23.2	0
BEND6	0.68542	1.5	0
BEND7	0.518635	8.1	1.31339
BEST3	0.301779	2.5	0
BHMT2	0.301463	1.4	0
BICC1	0.0307158	4.9	Not estimable
BIK	0.686085	3	0
BIN2	0.69463	3.5	0
BIVM-ERCC5	0.697405	1.2	0
BLOC1S1	0.697405	18.2	0
BLOC1S5	0.683685	8.2	0
BLVRA	0.222443	9.3	0
BLVRB	0.688606	7.6	0
BMF	0.687789	4.1	0
BMP8A	0.697405	4	0
BMPER	0.0268446	1.4	Not estimable
BMS1	0.697405	14.8	0
BNIPL	0.0268446	1	Not estimable
BOD1	0.0355279	25.7	Not estimable
BOK	0.442424	4.4	0
BORA	0.697405	7	0
BPI	0.729939	41.7	0.618868
BPIFB3	0.693912	3	0
BPIFB4	0.410883	1.8	1.86742
BPIFC	0.47687	1.2	0.648869
BPNT1	0.691038	10.4	0
BRAT1	0.692062	17	0
BRCA1	0.697405	17.6	0
BRCA2	0.00879364	16.9	7.47607
BRD2	0.697405	66.9	0
BRF1	0.225608	11.1	0
BRIP1	0.697405	10.8	0
BRMS1	0.302577	37.4	0
BROX	0.0268446	12.6	Not estimable
BSCL2	0.435899	59.5	0
BSN	0.0308305	5.1	Not estimable
BTBD1	1	18.4	1.24105
BTBD6	0.0319131	24.7	Not estimable
BTBD7	0.0310499	20	Not estimable
BTBD8	0.434813	8.3	0
BTD	0.194083	15	0
BTG4	0.0312576	24.8	Not estimable
BTN1A1	0.684889	1.3	0
BTN2A1	0.697405	13	0
BTN2A2	0.28722	5.1	3.73208
BTN3A2	0.122848	4.5	1.44913
BTN3A3	0.128116	3.5	2.08812
BTNL8	0.693306	3.5	0
BTNL9	0.306103	3	0
BYSL	0.686315	8.9	0
BZW1	0.692289	55.2	0
C10orf105	0.305808	3	0
C10orf120	0.229554	25.6	0
C10orf53	0.686085	50.8	0
C10orf55	0.308612	14	0
C10orf88	0.289949	16.1	3.73208
C11orf16	0.697405	2.7	0
C11orf42	0.186149	27.9	0
C11orf49	0.433732	19	0
C11orf53	0.687403	7.6	0
C11orf65	0.605024	45	0
C11orf80	0.689815	15.2	0
C11orf94	0.436478	43.4	0
C12orf10	0.446347	85.6	0
C12orf4	0.683685	14.1	0
C12orf40	0.00730181	26.4	Not estimable
C12orf56	0.292865	15	3.74242
C14orf28	0.308684	16.1	0
C14orf39	0.697405	14.9	0
C15orf41	0.280747	4.9	3.73208
C15orf48	0.213176	47.2	0
C16orf58	1	11.9	1.24242
C16orf74	0.697405	1.4	0
C16orf89	0.683114	1.4	0
C16orf91	0.43804	8.5	0
C16orf92	0.697405	17	0
C16orf96	0.690145	36	0
C17orf100	0.697405	3.6	0
C17orf107	0.794266	4.7	0.916667
C17orf47	0.697405	26.7	0
C17orf50	1	63.6	0.872878
C17orf51	0.440147	9.2	0
C17orf64	0.109134	74.5	0
C17orf67	0.683879	3.8	0
C17orf80	0.0112628	32.5	2.7747
C17orf97	0.697405	53.2	0
C18orf54	0.299972	25.2	0
C18orf63	1	17.4	1.24151
C19orf24	0.691843	16.8	0
C19orf33	0.697405	1.5	0
C19orf44	0.0422689	19.7	3.76336
C19orf67	0.431261	11.6	0
C19orf71	0.245755	88.8	2.48866
C1QB	0.697405	11.7	0
C1QBP	0.697405	21.3	0
C1QTNF1	0.697405	8.8	0
C1QTNF4	1	2	1.86415
C1QTNF9	0.172	1.6	2.16168
C1QTNF9B	0.236799	8.5	0
C1RL	0.0337817	7.2	Not estimable
C1orf123	0.0268446	26	Not estimable
C1orf141	0.688606	18.7	0
C1orf174	0.0335961	18.9	Not estimable
C1orf194	0.0314553	77.6	Not estimable
C1orf228	0.697405	17.9	0
C1orf50	0.0268446	15.9	Not estimable
C1orf53	0.690668	4.7	0
C1orf56	0.697405	67.7	0
C1orf61	0.697405	3.1	0
C1orf87	1	1.2	1.24105
C1orf94	0.00752044	24.6	Not estimable
C20orf141	0.687789	63.6	0
C20orf173	0.14983	28.3	1.87405
C20orf196	0.292602	4.2	3.73208
C20orf85	0.43803	62.8	0
C20orf96	0.697405	23.4	0
C21orf58	0.448879	5.7	0
C21orf91	0.69463	23.9	0
C22orf15	0.0268446	3.6	Not estimable
C22orf31	0.0268446	12.7	Not estimable
C22orf42	1	28.6	1.86415
C22orf46	0.697405	6.2	0
C2CD2	0.697405	2.7	0
C2CD3	0.233781	19.9	0
C2orf70	1	44.9	0.978618
C2orf73	0.224679	39.2	0
C2orf78	0.687277	14	0
C2orf80	0.0893562	1.7	2.19196
C2orf91	0.438453	1.1	0
C3AR1	0.689979	5.8	0
C3orf14	0.0726152	20.9	3.03876
C3orf22	0.0268446	28.3	Not estimable
C3orf30	0.697405	46.4	0
C3orf62	0.68753	76.9	0
C4orf22	0.285832	34.8	1.8876
C4orf3	0.443263	19.4	0
C4orf36	1	14	0.825758
C4orf47	0.43715	20.6	0
C5AR1	0.697405	6.3	0
C5orf15	0.697405	26.8	0
C5orf34	0.697405	12.8	0
C5orf42	0.253055	11.6	2.48567
C5orf49	0.461701	28.9	1.25498
C5orf52	0.0268446	45.2	Not estimable
C5orf60	0.697405	12.1	0
C6	0.435691	1.7	0
C6orf118	0.281793	9.6	3.73208
C6orf163	0.697405	20.2	0
C6orf222	0.697405	1.4	0
C6orf89	0.288903	36.3	3.73208
C7	0.115582	44.6	3.73552
C7orf25	0.687789	11	0
C7orf31	1	60.9	0.740458
C7orf49	0.0268446	20.1	Not estimable
C7orf50	0.686667	19.5	0
C7orf55-LUC7L2	0.697405	7.4	0
C7orf57	0.290724	11.4	3.73208
C8orf44	0.0268446	15.3	Not estimable
C8orf48	0.697405	17.3	0
C8orf74	0.697405	30.2	0
C9orf129	0.00799666	4.3	Not estimable
C9orf131	0.691428	46.6	0
C9orf135	0.689497	18.4	0
C9orf3	0.695567	6.4	0
C9orf43	0.4453	39.4	0
C9orf57	0.693306	31.4	0
C9orf64	0.291172	11.1	3.73208
CA2	0.697405	5.1	0
CA9	0.697405	1.4	0
CAB39L	0.697405	24.1	0
CABS1	0.301472	75.3	0
CACNA1B	0.0394976	8.1	0.246231
CACNA1E	0.697405	2.8	0
CACNA1G	0.695058	1.7	0
CACNA2D4	0.287944	1.7	3.73208
CACNG6	0.32664	1	1.73432
CALCOCO2	0.697405	51.8	0
CALCR	0.697405	2.3	0
CALHM2	0.300111	14.1	0
CALHM3	0.0268446	2	Not estimable
CALR	0.697405	65	0
CALR3	0.284915	43.6	3.73208
CAMK4	0.693306	13.8	0
CAMKMT	0.0268446	19	Not estimable
CAMTA2	0.684076	9	0
CAND2	0.689815	11.4	0
CAP2	0.0492618	1.1	7.54198
CAPN1	0.689041	8.3	0
CAPN11	0.314699	63.7	1.88077
CAPN2	0.442009	17.2	0
CAPN3	0.693306	4.1	0
CAPN5	0.697405	22	0
CAPRIN2	0.0268446	22.3	Not estimable
CAPS	0.683021	2.1	0
CAPS2	1	8	1.86742
CAPSL	0.689815	5.4	0
CAPZA3	0.697405	67.5	0
CARD6	0.436495	3	0
CARNS1	0.149353	1.1	2.80492
CARS2	0.28593	11.2	3.73208
CASC1	0.306277	25.3	0
CASP14	0.435692	1.6	0
CASP8AP2	0.684076	5	0
CASP9	0.288201	14.4	3.73208
CAST	0.686667	21.2	0
CATSPER1	0.686548	38.5	0
CATSPERD	0.42751	32.8	0
CATSPERG	0.433498	35.7	0
CBFA2T3	0.687659	3.2	0
CBL	0.689041	32.3	0
CBLB	1	9.2	1.24615
CBR3	0.439745	4.3	0
CBS	0.697405	2.2	0
CBWD1	0.240994	6.3	2.48679
CBY3	0.0268446	15.8	Not estimable
CC2D1B	0.0107298	24.3	11.2231
CC2D2A	0.231498	6.2	0
CC2D2B	0.116513	10.6	0.229717
CCBE1	0.689815	2.1	0
CCDC102A	0.686667	2.9	0
CCDC102B	1	4.3	1.86415
CCDC105	0.697405	38.7	0
CCDC110	0.693598	49.2	0
CCDC113	0.306544	21	0
CCDC114	0.433866	6.3	0
CCDC115	0.697405	13	0
CCDC116	0.132689	45.3	3.74242
CCDC121	1	27.5	0.930101
CCDC127	0.0330694	11.1	Not estimable
CCDC129	0.506257	2.7	0
CCDC13	1	15	1.24121
CCDC136	0.0268446	109.6	Not estimable
CCDC138	0.433942	19.4	0
CCDC14	0.126323	22.5	3.73552
CCDC141	1	1.6	1.86415
CCDC144NL	0.0648906	10.6	0.194673
CCDC146	0.443662	22.2	0
CCDC149	0.691038	5.4	0
CCDC15	0.441142	19.4	0
CCDC150	1	11.9	1.86307
CCDC152	1	5.7	1.86307
CCDC153	1	2.8	1.24121
CCDC154	0.434832	10.8	0
CCDC155	0.447103	51.2	0
CCDC158	0.444271	26.3	0
CCDC159	0.0491068	28.2	7.47607
CCDC168	0.434791	23.7	0.46442
CCDC17	0.697405	1.1	0
CCDC170	0.47032	5.9	1.50388
CCDC171	0.299842	20.4	3.73208
CCDC173	0.238817	53.4	0
CCDC175	0.697405	8.2	0
CCDC178	0.693598	16.4	0
CCDC18	0.443015	12.6	0
CCDC24	0.697405	15.4	0
CCDC27	0.693032	53.3	0
CCDC28A	1	15	0.742424
CCDC3	0.432854	11	0
CCDC30	1	12.4	1.86415
CCDC33	0.442017	41.5	0
CCDC34	1	31.5	1.24105
CCDC38	0.049592	37	7.54198
CCDC40	0.304733	29.5	0
CCDC42	0.697405	119.7	0
CCDC50	0.693306	18.7	0
CCDC54	0.0803407	53.5	1.62076
CCDC57	1	23.7	1.24105
CCDC62	0.0286301	44.3	Not estimable
CCDC63	0.688054	26.2	0
CCDC66	0.344113	8.6	1.65809
CCDC7	0.0075573	65.5	Not estimable
CCDC73	0.442619	13.7	0
CCDC78	0.693598	1.1	0
CCDC81	1	5.6	0.93032
CCDC87	0.279911	31.1	3.73208
CCDC88B	0.697405	7.3	0
CCDC88C	0.697405	4.8	0
CCDC91	0.697405	36.3	0
CCDC93	0.436739	15.9	0
CCER1	0.440114	51.2	0
CCL14	0.697405	15	0
CCL21	0.697405	5.5	0
CCL26	0.0315552	1.5	11.2231
CCL28	0.697405	1.1	0
CCL8	0.680578	1.6	0
CCNA1	0.252736	50.4	2.24715
CCNB1IP1	0.689041	9.7	0
CCNE2	0.697405	18.9	0
CCNT2	0.0268446	15.8	Not estimable
CCR7	0.694253	1.2	0
CCT6B	0.304027	71.5	0
CCT8L2	0.439273	18.6	0
CCZ1B	0.0346336	5.4	Not estimable
CD109	0.130021	3.3	3.73208
CD14	0.302766	6.5	0
CD163L1	0.689655	4.6	0
CD177	0.0772793	1.1	0.268456
CD1D	0.709582	1.4	0.742424
CD200R1	0.443459	2.5	0
CD209	0.177444	2.1	0
CD248	0.0308305	8	Not estimable
CD276	1	9.9	1.86307
CD300LD	0.697405	1.7	0
CD302	0.301252	9.2	0
CD33	1	1.5	0.896
CD36	1	6	1.0951
CD3E	0.685529	1.2	0
CD3EAP	0.690316	5.2	0
CD44	0.121767	7.2	3.76336
CD55	0.697405	10.2	0
CD68	0.683685	9.4	0
CD84	0.694253	2.8	0
CD93	0.697405	6.9	0
CD96	0.238541	1	0
CDC16	0.697405	34.5	0
CDC20B	1	6.3	1.24335
CDC25C	0.30381	22.3	0
CDC37L1	0.697405	10.8	0
CDC42BPG	0.697405	2.5	0
CDC42EP5	0.697405	7.9	0
CDC42SE1	0.302748	6	0
CDC45	0.697405	43.5	0
CDH12	0.693306	2.9	0
CDH19	0.283381	1.9	3.73208
CDH9	0.683879	3.7	0
CDHR2	0.233815	1.6	0
CDHR3	0.423643	2.2	1.87405
CDK10	0.697405	8.7	0
CDK17	0.697405	19.9	0
CDK5RAP1	0.686431	14.8	0
CDK5RAP2	0.221549	19.8	0
CDK5RAP3	0.433246	40.1	0
CDKL2	1	27.7	0.930346
CDKL3	0.257906	33.4	2.49242
CDKL4	0.0698942	7.9	2.6902
CDKL5	0.697405	14	0
CDKN2D	0.0268446	10.9	Not estimable
CDON	0.680578	4.1	0
CDRT1	0.439949	12.8	0
CDRT4	0.694253	36.8	0
CDS2	0.689815	13	0
CDT1	0.697405	3.3	0
CEACAM1	0.697405	1.3	0
CEACAM21	0.697405	1.5	0
CECR2	0.263704	6	2.50382
CELF6	0.0268446	7.2	Not estimable
CELSR2	0.697405	11	0
CEMP1	0.435227	1	0
CENPB	.	9	0.260673
CENPBD1	0.436325	8.2	0
CENPE	0.697405	6.6	0
CENPF	0.697405	9.4	0
CENPJ	0.136299	24.3	0
CENPQ	0.440787	8.8	0
CEP104	0.285165	24.2	3.73208
CEP112	0.16332	39.5	0
CEP128	0.697405	9	0
CEP135	0.288105	9.3	3.73208
CEP152	0.521247	15.8	0.530981
CEP19	0.307994	17.5	0
CEP192	0.694253	16.4	0
CEP250	0.43146	18.5	0
CEP290	1	15.7	1.24105
CEP41	0.286683	35.3	3.73208
CEP55	0.686907	19.3	0
CEP57L1	0.0268446	24.6	Not estimable
CEP63	0.0334043	37.2	Not estimable
CEP70	0.692772	41.5	0
CEP72	0.0492169	18.8	7.54198
CEP76	0.435237	18.4	0
CEP78	0.695058	22.5	0
CEP89	0.124018	8.4	3.73208
CEP95	0.689343	16.9	0
CERK	0.697405	6	0
CERS3	0.689041	37.9	0
CES1	0.22842	1	0
CES2	0.284144	8.5	3.74242
CES4A	0.199885	2	0
CES5A	0.685312	1.7	0
CFI	0.690316	3.6	0
CGB1	1	1.8	0.930276
CGB2	0.687921	4.1	0
CGN	0.305363	6.4	0
CGNL1	0.689655	5.2	0
CGREF1	0.383592	4	0.412429
CHADL	0.433473	2	0
CHCHD2	0.0268446	27.1	Not estimable
CHCHD5	0.688326	50	0
CHCHD7	0.0268446	7.6	Not estimable
CHD1L	0.243432	27.8	0
CHD8	0.294903	15.2	3.73208
CHD9	0.0310499	7	Not estimable
CHEK2	0.437795	9.7	0
CHGB	0.303419	2.4	0
CHI3L1	0.229248	3.4	0
CHI3L2	0.697405	4.4	0
CHML	0.0297838	9.9	Not estimable
CHMP4C	0.693032	1.9	0
CHODL	0.68753	59.6	0
CHPF2	0.43696	12.9	0
CHPT1	0.697405	28.3	0
CHRAC1	0.686431	26.1	0
CHRDL2	0.697405	7.6	0
CHRM3	0.697405	1.7	0
CHRNA5	0.444533	9.8	0
CHRNB2	0.289134	2	3.73208
CHRNB3	0.381142	5	1.49618
CHST13	0.0322488	9.7	Not estimable
CHST3	0.697405	19.4	0
CHST6	0.436057	1.3	0
CHST9	0.301581	8.5	0
CHTOP	0.697405	35	0
CHURC1	0.697405	19.5	0
CIB1	0.692289	25.7	0
CIB2	0.0335961	13.4	Not estimable
CIB3	0.691632	3.8	0
CIB4	0.697405	22.5	0
CILP	0.292314	18.4	3.73208
CINP	0.692525	19.9	0
CISD1	0.692062	3	0
CIT	0.686085	8.3	0
CIZ1	0.689655	35.4	0
CKAP2	0.697405	22.1	0
CKLF	0.0340789	42.5	Not estimable
CKLF-CMTM1	0.0340789	16.9	Not estimable
CKS1B	0.0331381	22.8	Not estimable
CLASRP	0.689041	14.3	0
CLCN2	0.00835714	11.9	Not estimable
CLCN7	0.0302161	17.6	Not estimable
CLCNKA	0.697405	1.1	0
CLDN20	1	1.3	1.24242
CLDN3	0.697405	1.2	0
CLDN5	0.687789	6.5	0
CLDND2	0.689655	31.4	0
CLEC10A	0.124247	3.7	3.76336
CLEC11A	0.697405	4.9	0
CLEC12B	1	30.9	0.929924
CLEC17A	0.235934	1.4	2.26154
CLEC1A	0.439882	3.3	0
CLEC2D	0.692289	5.7	0
CLEC4F	0.297904	2	0
CLEC4M	0.0268446	1.4	Not estimable
CLHC1	1	23.2	1.24105
CLIP1	0.697405	6.1	0
CLMN	0.697405	33.4	0
CLNK	1	1.1	1.86307
CLPB	0.122213	87.9	0
CLSTN2	0.687921	1.9	0
CLTCL1	0.304063	17.2	0
CLUAP1	0.697405	34.6	0
CMA1	0.292699	2.7	0.615482
CMPK1	0.697405	8.6	0
CMPK2	0.697405	9.2	0
CMSS1	0.697405	28.1	0
CMTM1	0.0428735	80.7	2.87598
CMTM2	0.438862	165.2	0
CMTM3	0.302078	61.7	3.73208
CMTM4	0.69049	6.3	0
CNBD1	1	16.9	1.24181
CNBD2	0.697405	31.1	0
CNGA1	1	1.4	0.618868
CNGA3	0.697405	1.1	0
CNGA4	0.0283594	7.4	Not estimable
CNGB1	0.439511	1.3	0
CNKSR1	1	1.5	0.93032
CNOT6	1	17.6	1.86742
CNPPD1	0.697405	22.6	0
CNPY4	1	9.1	0.743719
CNTLN	0.697405	8.2	0
CNTN2	0.435253	9.1	0
CNTNAP1	0.689979	2.3	0
CNTNAP3	0.691038	1.9	0
CNTNAP3B	0.288677	1.1	0.286784
CNTNAP4	0.0308305	2.2	Not estimable
CNTRL	0.689497	30.2	0
COA1	0.0268446	11.8	Not estimable
COA6	0.69123	5.8	0
COBLL1	0.112436	3	3.74242
COCH	0.697405	1.8	0
COG5	0.683114	12.6	0
COG6	0.691038	24	0
COG8	0.0276075	40.2	Not estimable
COIL	0.689815	58.8	0
COL11A2	0.697405	4.5	0
COL12A1	0.69123	10.6	0
COL14A1	0.693032	13.3	0
COL15A1	0.0841487	22.8	4.9795
COL17A1	0.685529	4	0
COL18A1	0.697405	11	0
COL19A1	0.293855	1.5	3.73208
COL1A1	0.684681	44.6	0
COL20A1	0.31542	3	0.585315
COL21A1	0.296808	3.8	0.371235
COL23A1	1	2.3	1.86307
COL24A1	1	1.9	1.24105
COL27A1	0.280195	2.7	3.73208
COL2A1	0.684076	2.8	0
COL3A1	0.684275	45.5	0
COL4A1	0.697405	8.7	0
COL4A2	0.277265	11	3.73208
COL4A3	0.29843	1.5	0
COL4A4	0.688606	1.9	0
COL5A3	0.0268446	5.3	Not estimable
COL6A2	0.0305974	33.2	Not estimable
COL6A5	1	1.1	1.06349
COL7A1	0.242614	1.6	0
COL9A1	0.697405	4.1	0
COLQ	0.0296245	2	Not estimable
COMMD3	0.0345802	19.5	Not estimable
COMMD3-BMI1	0.0345802	23.4	Not estimable
COMMD6	0.689655	21.9	0
COMMD7	0.690316	10.5	0
COMTD1	0.289177	1.5	3.73208
COPB1	0.00854984	21.7	7.64341
COPS7B	0.697405	24.5	0
COQ10B	0.697405	9.1	0
COQ3	0.292141	2.3	3.73208
COQ4	0.697405	17.5	0
COQ5	0.697405	16.9	0
CORIN	1	3.7	1.03416
CORO1B	0.697405	13.9	0
CORO2A	0.430123	11.4	0
CORO7-PAM16	0.684076	4.3	0
CORT	0.691843	2.1	0
COX11	0.0283594	10.8	Not estimable
COX19	0.697405	11.2	0
COX20	0.0302161	21.1	Not estimable
COX4I2	0.0304749	1.5	Not estimable
COX7A2L	0.684376	24.8	0
CPA3	0.438006	7.1	0
CPA4	0.435828	2.2	0
CPA6	0.697405	1.3	0
CPED1	0.284458	7.1	3.73208
CPLX1	0.697405	4.9	0
CPLX3	0.0268446	2.2	Not estimable
CPNE1	0.234438	25.6	0
CPNE3	0.804108	9.7	0.675063
CPOX	0.692289	3.9	0
CPQ	1	7.3	1.86415
CPS1	0.689041	1.3	0
CPSF2	0.697405	25.7	0
CPSF4L	0.697405	2.1	0
CPVL	1	10.6	0.930276
CPXM1	0.0268446	10.1	Not estimable
CPXM2	0.144388	7.7	7.47607
CPZ	1	4.4	0.74359
CRB1	0.691632	7.3	0
CREB3	0.697405	23	0
CREB3L2	0.697405	9.8	0
CREB3L4	0.697405	4.3	0
CRHR2	0.441429	1.8	0
CRIP2	0.299969	10.9	0
CRIP3	0.825692	13.5	0.618868
CRISPLD1	0.686085	3.2	0
CRLF3	0.035339	9.6	Not estimable
CRLS1	0.690316	12.3	0
CRNKL1	0.697405	16.1	0
CROCC	0.234514	1.9	0
CRTAP	0.697405	26.1	0
CRTC3	0.697405	15.3	0
CRX	0.697405	1	0
CRYBA2	0.688606	1.6	0
CRYBG3	0.697405	19.2	0
CRYGD	0.306881	1.4	0
CRYGS	0.697405	1.8	0
CRYL1	1	2.7	1.86415
CRYZ	0.458286	4.9	1.86524
CS	0.688894	7.9	0
CSF1R	0.0268446	4.9	Not estimable
CSGALNACT1	0.697405	2.7	0
CSNK1A1L	0.237341	9	0
CSPG4	0.697405	2.5	0
CSPP1	0.220785	25.7	0
CSRP1	0.690668	17.1	0
CST7	0.697405	1.7	0
CSTL1	1	7.5	0.742424
CT47B1	0.697405	10.7	0
CTAGE1	0.02908	12.9	Not estimable
CTAGE9	1	11.6	0.743396
CTBP2	0.120332	14.5	0.184045
CTC1	0.693306	8.8	0
CTCFL	0.697405	35.4	0
CTGF	0.286901	24.4	3.74242
CTHRC1	0.441416	8.4	0
CTNNA3	0.697405	3.6	0
CTNNAL1	0.697405	17.7	0
CTNND1	0.697405	27.8	0
CTNND2	0.688465	4.2	0
CTSA	0.0302161	14.3	Not estimable
CTSB	0.691428	21.5	0
CTSF	0.68753	37.1	0
CTSG	0.697405	2.8	0
CTSH	1	6.7	0.930276
CTSO	0.682291	9	0
CTSZ	0.686085	13.8	0
CTTNBP2	0.439922	2.2	0
CTU2	0.238259	22.8	0
CUBN	0.69463	1.2	0
CUEDC1	0.693598	2.9	0
CUL7	0.433068	7.7	0
CUTA	0.439301	27.3	0
CUX1	0.697405	8.3	0
CWC15	1	17.2	0
CWF19L2	0.292103	9	3.73208
CXCL2	0.689655	3.1	0
CXorf67	1	21.4	1.18478
CYB5D2	0.697405	54.1	0
CYB5R2	0.689041	58.8	0
CYB5R3	0.687789	44	0
CYB5RL	0.300776	1.2	0
CYP17A1	0.697405	82.3	0
CYP20A1	0.0307158	10.8	Not estimable
CYP27A1	0.293284	3.7	3.73208
CYP2A13	0.23951	1.1	0
CYP2F1	0.697405	4.9	0
CYP2W1	0.0308305	2.4	Not estimable
CYP39A1	0.697405	3.3	0
CYP4F11	0.437807	1	0
CYP4V2	0.195927	3.2	0
CYP4Z1	0.299294	1	0
CYP51A1	0.697405	35.7	0
CYP7B1	0.50399	3.2	0
CYYR1	0.441369	9.2	0
DALRD3	0.689041	32	0
DAPK3	0.697405	15.7	0
DBF4	0.697405	34.2	0
DBF4B	0.69049	10.9	0
DBR1	0.697405	5.8	0
DBX1	0.693598	1.8	0
DBX2	0.697405	2.9	0
DCAF13	0.305552	25.3	0
DCAF16	0.682652	19.2	0
DCAKD	0.444096	11.6	0
DCDC2B	0.686667	3.3	0
DCHS1	0.0268446	2.6	Not estimable
DCHS2	1	2.6	0.743719
DCLRE1C	0.688894	2.8	0
DCP1B	0.433493	15.8	0
DCST1	0.44267	10.7	0
DCST2	1	20.8	1.24121
DCUN1D4	0.437137	20.4	0
DCXR	0.697405	8.7	0
DDI1	0.692525	53.2	0
DDIT4L	1	1.1	1.24242
DDR1	0.690316	5.1	0
DDTL	0.459063	4.4	1.16943
DDX10	0.688749	25.1	0
DDX11	0.00724897	8.2	Not estimable
DDX19B	0.689655	64.3	0
DDX20	0.435265	81.7	0
DDX21	0.697405	12.9	0
DDX25	0.697405	64.2	0
DDX39B	0.000419923	21.3	7.64341
DDX47	0.697405	26.8	0
DDX53	0.697405	11.5	0
DDX54	0.697405	11.4	0
DDX55	0.439273	11.2	0
DDX60	0.684681	5.7	0
DDX60L	0.691428	2.7	0
DEC1	0.24636	2.3	2.24715
DEF8	0.692062	8.8	0
DEFB121	0.0268446	1.5	Not estimable
DEGS1	0.0268446	9.2	Not estimable
DENND2C	0.305401	4.5	0
DENND3	1	4.6	0.617424
DENND4B	0.442425	5.5	0
DENND6B	0.0268446	9	Not estimable
DEPDC1	0.439714	19.5	0
DEPDC1B	0.291405	17	3.73208
DERL2	0.692289	21	0
DES	0.693912	10.9	0
DFFA	0.43561	13.4	0
DGKD	0.286407	17.4	3.74242
DGKG	0.684889	1.2	0
DGKH	0.0333031	7	5.68846
DGKZ	0.697405	5	0
DGUOK	0.691632	34.3	0
DHDH	0.697405	2.8	0
DHRS1	0.11731	2.8	0
DHRS12	0.441409	3.9	0
DHRS13	0.697405	2.8	0
DHRS4	4.60714e-08	13.5	7.53846
DHRS4L2	0.693598	28.2	0
DHTKD1	0.0268446	4.4	Not estimable
DHX16	0.686548	36.8	0
DHX32	0.68542	20.6	0
DHX34	0.282541	21.8	3.73208
DHX35	0.697405	12.5	0
DHX38	0.697405	17.5	0
DHX57	0.697405	27.7	0
DIAPH1	0.692289	12.1	0
DIAPH3	0.032486	19.6	Not estimable
DIS3L	1	15.4	1.86307
DISC1	0.693306	2.2	0
DIXDC1	1	10.1	0
DKK3	0.697405	8.9	0
DLD	0.0355279	10.6	Not estimable
DLEC1	0.197341	28.9	0
DLG2	0.0334043	6.6	Not estimable
DLG5	0.283342	4.4	3.73208
DLGAP2	0.290175	12.5	3.73208
DLGAP3	0.69123	6.7	0
DMD	0.0268446	4.6	Not estimable
DMGDH	0.697405	1.2	0
DMP1	0.693598	3.6	0
DMPK	0.693598	5.9	0
DNAAF2	0.288699	48.1	3.73208
DNAAF3	0.0494841	60.1	7.54198
DNAH1	0.289458	5.3	3.73208
DNAH10	0.692289	16.4	0
DNAH12	0.291484	17.6	0.371708
DNAH14	0.73046	29.9	1.02512
DNAH17	0.297732	39.4	3.73208
DNAH2	0.442621	21	0
DNAH3	0.415513	6.2	1.86307
DNAH7	0.391569	18.3	1.49057
DNAH8	0.298883	36	0
DNAH9	0.154322	7.1	0
DNAI1	0.697405	47	0
DNAJB7	0.697405	24.9	0
DNAJC1	0.69049	7.7	0
DNAJC15	0.028867	16.7	Not estimable
DNAJC16	0.689655	11.1	0
DNAJC18	0.697405	51.4	0
DNAJC21	0.299686	41.9	0
DNAJC24	0.693306	8.2	0
DNAJC27	0.216587	30.4	2.49242
DNAJC4	0.442793	72.5	0
DNAJC5G	0.69123	58	0
DNAJC9	0.697405	4.3	0
DNASE1L3	0.0268446	1.5	Not estimable
DNHD1	1	58.7	1.24112
DNMBP	0.442906	8.6	0
DNPEP	0.697405	33.7	0
DNTTIP1	0.0268446	36.9	Not estimable
DOCK10	0.697405	2.3	0
DOCK5	0.301178	7.8	0
DOCK6	0.568061	5.4	0
DOCK7	0.687921	19.9	0
DOK3	0.29839	3.1	3.73208
DOLK	0.0268446	22.4	Not estimable
DOPEY1	0.436742	14.9	0
DOT1L	0.687789	64.7	0
DPAGT1	0.69049	5.4	0
DPEP1	0.691632	9.8	0
DPEP2	0.285222	2.5	3.74242
DPEP3	0.0268446	56.7	Not estimable
DPF3	0.682652	6.6	0
DPH1	0.4434	19.5	0
DPM1	0.0268446	25.6	Not estimable
DPM3	0.684275	21.5	0
DPP7	0.424719	30.9	1.86524
DPPA3	0.435004	3.6	0
DPY19L1	0.0323292	31.7	Not estimable
DPY19L2	0.690851	44	0
DPY19L3	0.697405	12.3	0
DPYD	0.434416	6	0
DPYSL4	0.441383	6.7	0
DRAXIN	0.697405	1.5	0
DRD3	0.0268446	4.2	Not estimable
DRD4	0.283301	1.8	3.73208
DRD5	0.685529	1.3	0
DSCAML1	0.0268446	4.2	Not estimable
DST	0.441008	11.7	0
DTD2	0.695058	14.6	0
DTHD1	1	2.2	0.674242
DTNB	0.447771	9	0
DUOX1	0.306633	1	0
DUS3L	0.697405	42.5	0
DUS4L	0.432364	7.7	0
DUSP12	0.439514	8.2	0
DUSP16	0.697405	8.6	0
DUSP18	0.127533	30.8	0
DUSP19	0.686315	10.4	0
DVL2	0.688606	14.5	0
DYDC2	0.43524	5.2	0
DYNC2H1	1	14.3	1.86307
DYRK2	0.693032	4.4	0
DYRK3	0.689041	38.2	0
DYSF	0.687403	1.5	0
DZANK1	0.0330694	5.2	Not estimable
DZIP1	0.68753	27.3	0
DZIP3	0.692772	29.9	0
E2F4	0.433915	19.5	0
EAF1	0.686786	9.7	0
EAF2	0.308518	5.7	0
EARS2	0.686667	12.6	0
EBF4	0.697405	2.8	0
EBNA1BP2	0.0105569	24.8	11.2814
ECD	0.0331381	25.4	Not estimable
ECH1	0.302514	26.2	0
ECHDC3	0.688606	6.7	0
ECHS1	0.685972	10.2	0
ECI1	0.684275	8.4	0
ECI2	0.697405	11.9	0
ECT2L	0.595002	1.2	0.908717
EDEM2	0.0268446	5.8	Not estimable
EDIL3	0.697405	1.4	0
EDNRA	0.69049	9.1	0
EDNRB	0.688894	3.1	0
EEA1	0.436745	7.8	0
EEF2K	0.695567	4.6	0
EFCAB10	0.289933	34.9	1.52497
EFCAB11	0.685312	36.9	0
EFCAB13	1	20	0.619824
EFCAB2	0.171598	24.4	2.08812
EFCAB3	0.131828	11.3	3.73208
EFCAB5	0.0667642	16.3	0.416576
EFCAB6	1	32.2	1.24288
EFEMP2	0.0268446	19.9	Not estimable
EFHB	0.208784	19.2	0.308851
EFHC1	0.697405	23.1	0
EGFL7	0.697405	11.4	0
EGFL8	0.130819	2.3	2.4962
EGFLAM	1	9.1	1.24105
EGR3	0.122332	4.1	3.76336
EHBP1L1	0.686907	3.7	0
EID3	0.697405	69.1	0
EIF2AK3	0.697405	4.6	0
EIF2AK4	0.697405	11.5	0
EIF2B1	0.691632	29.1	0
EIF2B2	0.0315508	20.1	Not estimable
EIF3M	0.691428	43.5	0
EIF4G2	0.0268446	60.5	Not estimable
EIF4G3	0.685972	67.1	0
EIF5B	0.693306	22.6	0
EIF6	0.686315	24.1	0
ELAVL2	0.697405	45.3	0
ELK1	0.683397	19.1	0
ELL	0.692062	31.7	0
ELL3	0.697405	12.3	0
ELMO3	0.81204	8.7	1.86415
ELMOD3	0.297984	12.3	3.73208
ELN	0.0268446	8.1	Not estimable
ELOVL3	0.697405	6.8	0
ELP2	0.697405	19.4	0
ELP5	0.697405	103.3	0
EMB	0.287217	10.5	3.73208
EMC10	0.697405	24.3	0
EMC9	0.0268446	10.3	Not estimable
EME2	0.697405	1.1	0
EMG1	0.697405	4.8	0
EMILIN2	1	2.8	1.86307
EML3	0.697405	11.2	0
EML6	0.443852	1.5	0
EMP3	0.28697	18.2	3.73208
ENAM	0.429457	1.2	0
ENDOG	0.441156	6.1	0
ENDOV	0.027291	20	0
ENGASE	0.29089	3.9	3.73208
ENHO	0.697405	6.4	0
ENKD1	0.689041	19.6	0
ENO2	0.689343	3.2	0
ENO4	0.130017	8.8	3.73208
ENOPH1	0.697405	6.1	0
ENPP1	0.697405	4.6	0
ENPP2	0.694253	9.7	0
ENPP3	0.697405	1	0
ENPP4	0.697405	7.1	0
ENPP5	0.444531	16.2	0
ENPP6	0.692289	2.7	0
ENTPD2	8.79201e-05	6.8	23.3386
ENTPD3	0.30829	1.3	0
ENTPD5	0.697405	4.5	0
ENTPD7	0.697405	3.5	0
EP300	0.0268446	20.6	Not estimable
EPB41L2	0.0315508	32.2	Not estimable
EPB41L4A	0.295448	4.8	3.73208
EPC2	0.684376	13.8	0
EPHA10	1	24.8	0.619586
EPHA2	0.697405	2.4	0
EPHX3	0.29612	2.7	3.73208
EPHX4	0.697405	2.6	0
EPN3	0.446103	2.2	0
EPO	1	2.4	1.24242
EPPK1	0.294727	2.3	3.73208
EPRS	0.436259	13.2	0
EPS8L2	0.697405	7.2	0
EPSTI1	0.0268446	5.8	Not estimable
ERAL1	0.691428	17.3	0
ERAP1	0.875803	5.4	1.11707
ERBB2	0.697405	6.5	0
ERCC2	0.689343	17.2	0
ERCC4	0.697405	14.2	0
ERCC5	0.697405	14	0
ERCC6	0.285414	7.8	3.73208
ERCC6L2	0.442472	12.5	0
ERLEC1	0.0268446	21	Not estimable
ERMAP	0.0268446	4.2	Not estimable
ERV3-1	0.188595	9.4	0
ERVW-1	0.0424646	10.4	0.277179
ESCO2	0.697405	10.3	0
ESF1	0.697405	14.3	0
ESPL1	0.694253	10.9	0
ESPN	0.697405	37.7	0
ESRRA	.	2.2	0.205882
ESRRB	0.688894	2	0
ESX1	0.697405	25.4	0
ESYT1	0.438865	19.7	0
ESYT2	0.697405	13.3	0
ESYT3	1	1.4	0.930189
ETAA1	0.684376	11.3	0
ETS2	1	8.3	1.24151
ETV2	0.697405	40.3	0
ETV4	0.697405	1.3	0
ETV7	0.0323292	1.1	Not estimable
EVC2	1	4.5	1.86307
EVPLL	0.697405	2.5	0
EXD3	0.0268446	5.1	Not estimable
EXO1	0.0268446	14.8	Not estimable
EXO5	0.447282	10.1	0
EXOC2	0.0072216	25.7	Not estimable
EXOC3L1	0.44184	1	0
EXOC3L2	0.697405	2.1	0
EXOG	0.438453	9.7	0
EXOSC10	0.287183	20.3	3.73208
EXOSC2	0.697405	8.4	0
EXOSC4	0.697405	45	0
EXOSC9	0.307165	36.7	0
EXTL1	0.697405	1	0
EYA2	0.697405	4.9	0
EYS	0.234066	2.9	0
F10	0.437203	9.5	0
F11R	0.438457	11	0
F13A1	0.684889	16.7	0
FAAH	0.235328	30.9	0.387161
FABP3	0.693598	2	0
FADS6	0.112953	1	0
FAHD1	0.304921	6.9	0
FAHD2B	0.388133	11.4	0.683269
FAM104B	0.00183786	14.2	Not estimable
FAM107B	0.0268446	11.6	Not estimable
FAM110C	0.693598	4.9	0
FAM111A	0.282046	5.9	3.73208
FAM111B	1	1	1.86307
FAM114A2	0.0315508	30.7	Not estimable
FAM118B	0.0498149	23.6	7.47607
FAM120AOS	1	9.1	0.825758
FAM124B	0.297276	2.3	3.74242
FAM126A	0.0346336	22.3	Not estimable
FAM129A	0.304109	4.1	0
FAM135A	0.69123	11	0
FAM136A	0.0673574	9.6	0
FAM149A	0.288216	3.6	3.73208
FAM149B1	0.697405	16.6	0
FAM151B	0.0268446	3.2	Not estimable
FAM160B2	0.438632	6.4	0
FAM162A	0.697405	16.9	0
FAM162B	0.292318	2.9	3.74242
FAM167A	0.697405	3.2	0
FAM167B	0.68542	1.8	0
FAM170A	0.683685	37	0
FAM173B	0.580259	6.5	0.70671
FAM174A	0.690316	37.3	0
FAM177B	0.201005	1.2	0
FAM178B	0.436499	29.5	0
FAM180A	0.690316	3.9	0
FAM181A	0.687403	19.2	0
FAM181B	0.697405	1.7	0
FAM183A	0.227599	6.7	0
FAM184A	0.300608	23.2	0
FAM186A	0.444173	19.3	0.654843
FAM186B	0.21614	58	0.435027
FAM189A2	0.697405	1.5	0
FAM193A	0.694253	29.1	0
FAM198B	0.693598	7	0
FAM19A3	0.518643	8.8	0.704471
FAM200A	0.23765	16.1	0
FAM200B	0.0318252	11.5	Not estimable
FAM205A	0.697405	24.3	0
FAM207A	1	25.2	1.86742
FAM208B	0.0268446	29.7	Not estimable
FAM209B	0.4353	40.8	0
FAM20C	0.697405	5.9	0
FAM212A	0.69123	2.4	0
FAM212B	0.697405	4.3	0
FAM217A	0.288651	16.9	3.73208
FAM218A	0.683021	8.8	0
FAM219B	0.687789	5.2	0
FAM221A	0.697405	22.9	0
FAM221B	0.0268446	27.3	Not estimable
FAM222A	0.689815	17.4	0
FAM227A	0.303996	15.6	0
FAM227B	0.04995	19	7.47607
FAM228B	1	11.5	0
FAM45A	0.697405	7.1	0
FAM47C	0.133453	7.9	0.146734
FAM47E	0.329305	9.2	1.44478
FAM47E-STBD1	0.329305	6.1	1.44478
FAM57A	0.697405	7.2	0
FAM69A	0.692062	6.4	0
FAM71B	0.690145	31.6	0
FAM71C	0.697405	31.7	0
FAM71D	0.683588	42.6	0
FAM71E1	0.0268446	36	Not estimable
FAM71F2	0.433681	28.1	0
FAM83D	0.434856	3.8	0
FAM83E	0.686667	1	0
FAM83H	0.692289	1.3	0
FAM86C1	0.162134	1.8	0
FAM89A	0.697405	2.8	0
FAM8A1	0.226714	28.4	0
FAM90A1	0.441207	2.1	0
FAM91A1	0.687789	11.9	0
FAM98C	0.399289	5.4	1.86415
FAM9A	0.0268446	9.2	Not estimable
FAM9B	0.697405	11.4	0
FAN1	0.442654	9.4	0
FANCA	1	28.8	1.24105
FANCC	0.697405	19.6	0
FANCD2	0.00732364	23.3	Not estimable
FANCD2OS	1	53	1.86742
FANCI	0.697405	28.3	0
FANCL	1	14.7	1.24121
FANCM	0.428604	15.4	0
FANK1	1	44.7	1.86742
FARP2	0.306573	27	0
FASTK	0.0335961	10.6	Not estimable
FASTKD1	0.427502	9.6	0
FASTKD5	0.689815	14.9	0
FAT2	0.697405	2.7	0
FBF1	0.685099	40.4	0
FBLIM1	0.697405	22.3	0
FBN3	1	1.1	1.48995
FBP1	0.686548	1	0
FBXL12	0.694253	11.8	0
FBXL13	0.121105	24.8	3.73552
FBXL18	0.692062	5.7	0
FBXL4	0.294925	6.9	3.73208
FBXL6	0.133996	5.6	3.73552
FBXO15	0.692289	19.2	0
FBXO17	0.439308	3.9	0
FBXO18	0.0316442	27.1	Not estimable
FBXO2	0.691038	4.4	0
FBXO22	0.690145	15	0
FBXO27	0.686548	3.6	0
FBXO30	0.692289	9	0
FBXO36	0.247401	14	0
FBXO38	0.0268446	20	Not estimable
FBXO39	0.0268446	39.2	Not estimable
FBXW10	0.520906	15.9	1.33339
FBXW12	0.287421	1.1	3.74242
FBXW5	1	67.8	0.930346
FBXW8	0.688054	12.4	0
FCAR	0.310445	2.1	1.87072
FCER1G	0.693598	11.6	0
FCGR2A	0.311692	4.8	0
FCGR3A	0.689343	1.2	0
FCHO2	0.697405	10.5	0
FCHSD1	0.307848	7.4	0
FCN1	0.599392	1	0.674242
FDXR	0.697405	32.1	0
FECH	0.434133	5.8	0
FER1L5	0.439489	17.9	0
FER1L6	1	3.8	0.743976
FERMT1	0.697405	1.1	0
FES	0.683685	3.2	0
FFAR4	0.686907	2	0
FGD2	0.494981	1.2	1.86524
FGD6	0.44429	5.6	0
FGFR1	0.697405	16.4	0
FGFR3	0.687789	8.1	0
FGFR4	0.434381	2.9	0
FGFRL1	0.697405	3.2	0
FGGY	0.284087	2.9	0.409091
FHAD1	0.688465	28.5	0
FHL5	0.695567	95.7	0
FHOD1	0.229748	2.2	0
FIBIN	0.697405	5	0
FIBP	0.00766189	40.7	Not estimable
FICD	0.697405	8.5	0
FIGNL1	0.697405	8.9	0
FIGNL2	0.686907	1.3	0
FILIP1	0.0484659	2.8	7.49242
FILIP1L	0.438308	19.9	0
FKBP2	0.0268446	19.8	Not estimable
FKBP6	0.697405	33	0
FKBPL	1	7.6	1.24151
FKRP	0.252244	13	0.520879
FLAD1	0.446904	19.1	0
FLII	0.697405	15.6	0
FLOT1	0.697405	11.7	0
FLT3	0.0268446	1.2	Not estimable
FLT4	0.686315	3.5	0
FLYWCH1	0.689979	5.1	0
FMN2	0.697405	3.4	0
FMO2	0.690668	3.3	0
FMO4	0.290415	2	3.73208
FMO5	0.30076	1.2	0
FMOD	0.697405	14.2	0
FN1	0.684579	9	0
FN3K	0.697405	4.6	0
FN3KRP	0.683588	8.8	0
FNDC1	0.0492272	2.1	7.47607
FNDC4	0.0337817	10.2	Not estimable
FOCAD	0.293975	3.6	3.73208
FOXD1	0.697405	6.8	0
FOXD4	1	3.1	0.675472
FOXD4L1	0.697405	3.1	0
FOXD4L5	0.684376	1	0.229646
FOXK2	0.158671	32.3	0.463497
FOXO6	.	1.2	0
FOXR1	0.687403	8.9	0
FOXRED1	0.697405	6.8	0
FPGT	0.438233	8.7	0
FPGT-TNNI3K	0.304406	4.1	0
FRA10AC1	0.434608	13.3	0
FRAS1	1	1.4	0.930346
FREM1	0.434585	3.5	0
FRMPD1	1	15.3	1.86307
FRMPD2	0.234281	1.5	0
FRRS1	0.401982	2.9	0.463208
FRYL	0.68753	5.2	0
FSBP	0.697405	5.6	0
FSCB	0.0346336	27	Not estimable
FSCN3	0.0232109	62.1	5.00253
FSIP1	0.443038	13.9	0
FSIP2	1	27.6	1.24121
FSTL1	0.693306	19.8	0
FSTL4	0.684376	2.8	0
FTCD	0.689979	1.5	0
FUBP3	0.686315	30	0
FUK	0.295238	6.1	3.73208
FUT10	0.439254	4.1	0
FUT3	0.438237	1.3	0
FUT4	0.444076	2.9	0
FUT5	0.375954	1.6	0
FUZ	0.686431	116.2	0
FXR1	0.0346336	39.1	Not estimable
FZD8	.	4.1	0
GABRR3	0.267637	1.8	0.218342
GAD2	0.0268446	1.7	Not estimable
GADL1	0.308462	1.1	0
GAK	0.697405	28.6	0
GAL3ST3	0.689041	2.6	0
GAL3ST4	0.691038	4.4	0
GALK2	0.697405	9.2	0
GALNT10	0.0268446	4.3	Not estimable
GALNT11	0.0268446	7.3	Not estimable
GALNT14	0.691428	1.6	0
GALNT3	0.690316	17.6	0
GALNT4	0.289712	1.4	3.73208
GALNT7	0.697405	6.4	0
GALNT8	0.177868	18.5	0
GALNTL5	0.303925	45	0
GALT	0.697405	2.6	0
GANC	1	24.5	1.86307
GAP43	0.435677	1.6	0
GAPDHS	0.235355	154.6	0
GARNL3	0.436894	4	0
GARS	0.697405	29.7	0
GAS2	0.686667	1.1	0
GATC	0.697405	5	0
GATM	0.0312576	8	Not estimable
GBE1	0.437152	4.6	0
GBGT1	0.697405	4.3	0
GBP1	0.157818	4.6	2.29134
GBP3	0.687789	3.2	0
GBP4	0.697405	2.6	0
GBP5	0.438659	4.5	0
GCA	0.263188	10.7	0.367424
GCAT	0.175082	5.9	0
GCC1	0.292579	20.7	3.73208
GCC2	0.428177	15.5	0
GCFC2	0.140772	10.9	0
GCNT2	0.294501	9	3.73208
GCNT7	0.697405	1.6	0
GCOM1	0.690316	2.5	0
GCSH	0.0331381	3.5	Not estimable
GDF15	0.0268446	2.5	Not estimable
GDPD3	0.0268446	1.2	Not estimable
GDPD4	0.156712	7.6	1.69508
GDPGP1	0.0352909	9.5	Not estimable
GEMIN2	0.0305974	13.2	Not estimable
GEMIN5	0.688749	13.8	0
GFM2	0.289942	13.7	3.73208
GFPT2	0.0314553	6.3	Not estimable
GGT5	0.0302161	1.2	Not estimable
GHDC	0.00738473	8.4	Not estimable
GIMAP2	0.691843	2.5	0
GIMAP8	1	3.9	1.86415
GINM1	0.302137	31	0
GJA10	0.690668	2.3	0
GJA3	0.688606	4.2	0
GJA8	0.0268446	18	Not estimable
GJB6	0.29975	1.7	0
GJC3	0.301101	1.6	0
GK2	0.436059	61	0
GLB1	0.692289	10	0
GLB1L	0.697405	57	0
GLB1L2	0.160342	7	0.369018
GLB1L3	0.0297838	2.4	Not estimable
GLDC	0.697405	1.1	0
GLE1	0.436534	42.8	0
GLG1	0.697405	37.5	0
GLI1	0.689655	6.2	0
GLI3	0.697405	2.3	0
GLIPR1	0.43736	7.2	0
GLIPR1L1	0.440537	45.6	0
GLIPR1L2	0.282603	44	3.73208
GLIS3	0.697405	4.6	0
GLO1	0.048179	12.9	7.49242
GLRA3	0.0268446	1.7	Not estimable
GLS2	0.697405	1.1	0
GLT1D1	0.68542	14.7	0
GLT6D1	0.431949	10.3	0
GLT8D2	0.693912	7.8	0
GLTP	0.444909	4	0
GLYCTK	0.697405	2.7	0
GMPR	0.636087	25.1	0.818898
GMPR2	0.697405	10.6	0
GNA11	0.234054	20.1	0
GNAT2	0.44034	6.4	0
GNAT3	0.697405	1.1	0
GNB1L	0.697405	6.1	0
GNE	0.697405	3.4	0
GNL3	0.294958	15	3.73208
GNPAT	0.697405	26.5	0
GNPDA2	0.686786	11.1	0
GNPTAB	0.0341516	7.4	5.6087
GNPTG	0.049402	18	7.47607
GNRH1	0.697405	1.7	0
GOLGA2	0.455266	16.1	1.86742
GOLGA4	0.697405	26	0
GOLGA6B	0.307129	10.5	0
GOLGA6L1	0.565423	7.4	0
GOLGA6L10	0.689343	8.2	0
GOLGA6L2	0.279924	29.9	1.43379
GOLGA6L4	0.336478	6.1	0.48855
GOLGA6L6	0.695567	7.2	0.191324
GOLGA8A	0.233599	8.3	0
GOLGA8K	0.697405	9.2	0
GOLIM4	0.442625	4.9	0
GON4L	0.440779	14.1	0
GOPC	0.439077	17.6	0
GOT1L1	0.124958	16.4	0.510787
GP6	0.30471	4.2	0
GPAA1	1	24.6	1.49242
GPAT2	0.69123	7.3	0
GPBAR1	1	1.5	1.39792
GPD1L	0.697405	3.2	0
GPHB5	1	1.7	0
GPI	0.697405	19.7	0
GPN3	0.0312576	28.3	Not estimable
GPNMB	0.246803	19.8	2.48866
GPR1	0.700396	1.6	1.49618
GPR108	0.439522	26.3	0
GPR137	0.692525	64.8	0
GPR137B	0.697405	3.1	0
GPR146	0.697405	4.9	0
GPR156	0.689655	7.7	0
GPR157	0.0268446	2.1	Not estimable
GPR158	0.69463	1.9	0
GPR160	0.697405	2.9	0
GPR161	0.438071	3	0
GPR17	0.697405	1.8	0
GPR176	0.688606	9.9	0
GPR55	0.697405	7.7	0
GPR83	1	1.1	1.86307
GPR84	1	2.1	1.24121
GPR89A	0.285588	6.7	3.74242
GPRC5A	0.697405	4.8	0
GPRIN2	1	1.3	0.969531
GPSM1	0.307932	12	0
GPX4	0.693032	170.4	0
GPX5	0.123956	5.1	3.76336
GRAMD1A	0.0268446	11.7	Not estimable
GRAMD1C	0.30371	14.5	0
GRHPR	0.302996	13	0
GRIA4	0.697405	1.1	0
GRID2IP	0.439941	1.2	0
GRIK1	0.684076	1.4	0
GRIK4	0.691632	2	0
GRIP1	0.0330694	7.3	Not estimable
GRK4	0.688465	41.2	0
GRK5	0.693598	3.5	0
GRK7	0.0331381	1	Not estimable
GRM6	0.447915	2.2	0
GRTP1	0.0268446	9.4	Not estimable
GRXCR1	0.689655	1.9	0
GRXCR2	0.0322488	3.5	Not estimable
GSC	0.697405	1.7	0
GSC2	0.286417	6.3	3.74242
GSN	0.0862268	32.5	0
GSS	0.694253	16.8	0
GSTA1	0.0268446	78.2	Not estimable
GSTA5	0.438663	1.3	0
GSTCD	0.0268446	20.5	Not estimable
GSTM2	0.196555	9.2	2.26154
GSTM3	0.022002	96	5.00253
GSTM4	0.285924	11.8	3.74242
GSTM5	0.00783101	5.1	7.64341
GSTO1	0.69123	7	0
GSTO2	0.685099	30.3	0
GSTP1	0.689041	15.4	0
GTF2A1L	0.0483976	47.7	7.49242
GTF2H2	0.301559	3.9	0
GTF2H2C	0.689041	4.2	0
GTF2H3	0.0268446	17.9	Not estimable
GTF2IRD1	0.687659	4.5	0
GTF2IRD2B	0.445259	3.5	0
GTF3C2	0.697405	24.8	0
GTF3C5	0.278664	24.2	3.74242
GTPBP10	0.697405	16.6	0
GTPBP3	0.697405	3.5	0
GTPBP8	0.0268446	22.7	Not estimable
GUCY2D	0.684993	5	0
GUCY2F	1	1.7	0.930276
GUF1	0.232981	11.7	0
GULP1	0.697405	17	0
GXYLT1	0.209342	13.4	0.21795
GXYLT2	0.689815	8.4	0
GYG1	0.690316	47.3	0
GZMH	0.697405	2.5	0
GZMM	0.697405	1.5	0
H6PD	0.69463	12.4	0
HABP4	1	21.8	0.742424
HACL1	0.697405	18.4	0
HAGHL	0.687659	3.5	0
HAP1	0.36608	3.4	1.60414
HAPLN3	0.697405	1.9	0
HARS2	0.697405	15.1	0
HAUS3	0.0302161	12.5	Not estimable
HAUS4	0.0268446	12.2	Not estimable
HAUS5	0.697405	10.9	0
HAUS6	0.790034	27.1	1.40481
HAVCR1	0.0268446	1.1	Not estimable
HAX1	0.438432	31.3	0
HBP1	0.106713	25.9	0.328244
HCAR2	0.296299	2.8	3.74242
HCAR3	0.286343	1.6	3.73208
HCLS1	0.697405	3.6	0
HCRTR2	0.0268446	1.5	Not estimable
HDGFL1	0.294431	97.1	3.74242
HEATR1	0.697405	20.3	0
HEATR4	0.191182	14	0
HEATR5A	1	13.2	1.86307
HEG1	0.185394	11.3	0
HELB	1	1.8	0.824427
HELQ	0.292543	10.7	3.74242
HEMGN	0.651019	32.5	1.25197
HEMK1	0.697405	19.5	0
HERC4	0.689041	22.2	0
HEXDC	0.697405	4.7	0
HEXIM2	0.295401	27.7	3.74242
HGF	0.69463	2	0
HGSNAT	0.297322	8.5	3.73208
HHAT	0.697405	6.2	0
HHATL	0.697405	1.7	0
HHEX	0.0268446	1.9	Not estimable
HHIPL1	0.50469	1.7	0
HHIPL2	0.439844	10.4	0
HIGD1C	1	3.6	1.24242
HINFP	0.690668	11.4	0
HIP1	0.697405	18.5	0
HIPK3	0.697405	14.7	0
HIPK4	0.697405	34.7	0
HIRIP3	0.697405	34	0
HIST1H1D	0.292903	4.6	3.73208
HIST1H1T	0.439769	257.2	0
HIST1H2AH	0.128839	23.5	3.74242
HIST1H2AL	0.697405	13.1	0
HIST1H2AM	0.694253	4.8	0
HIST1H2BB	0.0268446	15.8	Not estimable
HIST1H2BD	0.696233	7.1	0
HIST1H2BE	1	5.4	1.24427
HIST1H2BM	0.0268446	3.5	Not estimable
HIST1H3A	0.170794	78.7	0
HIST1H3E	0.0268446	19.9	Not estimable
HIST1H3G	0.00739328	5	Not estimable
HIST1H4B	0.697405	10.5	0
HIST1H4C	0.691632	25.5	0
HIST1H4D	0.0268446	9.8	Not estimable
HIST1H4F	0.697405	18.9	0
HIST4H4	0.622547	6.6	1.22198
HIVEP1	0.697405	7.3	0
HK1	0.697405	28.9	0
HKR1	0.306971	22.6	0
HLA-A	0.000912561	26.6	15.0278
HLA-B	0.0319131	32.1	Not estimable
HLA-C	0.754732	20.3	1.31643
HLA-DOA	1	1.2	0.618868
HLA-DPA1	0.0223735	8.6	0.136465
HLA-DQA1	0.00395414	2.1	0.498136
HLA-DQB1	0.607141	4.6	0.28414
HLA-DRB1	7.54121e-07	5.6	0.18083
HLA-DRB5	0.0237289	4.6	0.303682
HLA-F	0.226577	4.9	0
HM13	0.697405	11.7	0
HMCN1	0.697405	2.4	0
HMGCLL1	1	5.5	1.24242
HMGCS2	0.298577	6.1	3.73208
HMGN5	0.0268446	48.6	Not estimable
HMGXB4	0.697405	12.1	0
HMMR	0.185157	16.7	0
HNRNPA1L2	0.697405	2	0
HNRNPC	0.00714049	62.4	Not estimable
HNRNPCL1	0.697405	1.2	0
HNRNPUL1	0.439278	54.3	0
HOMER3	0.547127	3.4	0.528139
HOMEZ	0.299703	39.9	0
HOOK2	1	7.4	1.86307
HORMAD2	0.695567	21.3	0
HOXC5	0.697405	2.4	0
HOXD1	0.0296245	2.2	Not estimable
HOXD3	0.697405	3.6	0
HP1BP3	0.0268446	27.9	Not estimable
HPCA	0.0268446	2.5	Not estimable
HPGDS	0.693306	1.8	0
HPS1	0.693598	11.6	0
HPS3	0.284861	8.5	3.73208
HPS5	0.690851	17.5	0
HR	0.289149	5.2	3.73208
HRASLS5	0.697405	49.4	0
HRCT1	0.0268446	5.3	Not estimable
HRH4	0.686907	1.4	0
HRNR	1	1.3	0.930241
HS6ST1	0.00738498	14.7	Not estimable
HSD11B1L	0.299932	4.3	0
HSD17B8	0.0128912	5.1	4.6986
HSF2	0.0268446	31.7	Not estimable
HSF4	0.685972	3.4	0
HSH2D	1	1.1	0.740458
HSP90AA1	0.684889	84.6	0
HSP90B1	0.68542	25.7	0
HSPA12B	0.697405	5.2	0
HSPA4L	0.692289	73	0
HSPA6	0.686548	1.4	0
HSPB11	0.693032	19.6	0
HSPBP1	0.0268446	21.1	Not estimable
HSPG2	0.229912	11.4	3.73208
HTR3B	0.697405	1.5	0
HTRA1	.	9.8	0
HTT	0.0268446	14.9	Not estimable
HUS1B	0.0268446	4.3	Not estimable
HVCN1	0.687921	24.5	0
HYDIN	.	19.1	0
HYI	1	4.5	0.929924
IAH1	0.0268446	49.9	Not estimable
IARS	0.0268446	18.7	Not estimable
IARS2	0.686431	15.7	0
IBTK	0.697405	6.2	0
ICAM3	0.00893422	1.4	7.64341
ICOSLG	0.289153	2.3	3.74242
ID1	0.693598	7.8	0
IDE	0.0268446	18.1	Not estimable
IER3IP1	0.694253	17	0
IFFO1	0.288914	10.3	3.73208
IFI27L2	0.69463	9.1	0
IFI44	0.537743	4.8	0.528139
IFIH1	0.0334348	4.3	5.60347
IFIT3	0.442004	5.1	0
IFIT5	0.0335961	7	Not estimable
IFT122	0.686667	84.7	0
IFT172	0.294737	21.3	3.73208
IFT43	0.693912	23.5	0
IFT57	0.276418	38.6	3.73208
IFT74	0.697405	35.9	0
IGDCC3	0.262446	4.7	2.50382
IGDCC4	0.0268446	2.5	Not estimable
IGF1R	0.334429	12	0.854707
IGF2R	0.437572	13.8	0
IGFBP7	0.684889	68	0
IGFL2	0.692289	2.4	0
IGFLR1	0.188265	3.5	0
IGFN1	1	1.1	0.743811
IGSF22	0.123658	2.2	3.73552
IGSF5	0.00180544	1.5	Not estimable
IL16	0.697405	2.2	0
IL17C	0.69463	2	0
IL17D	0.682652	1.9	0
IL17RB	1	2.5	1.24151
IL17RD	0.69049	11.2	0
IL18R1	0.697405	2.4	0
IL1A	0.697405	10.9	0
IL1R2	0.691632	1.6	0
IL1RN	0.690316	1.4	0
IL20	0.697405	1	0
IL31RA	0.691843	5.9	0
IL32	0.00815253	4.6	Not estimable
IL3RA	0.697405	1.5	0
ILDR1	0.258281	1.5	1.8876
ILVBL	0.697405	14.7	0
IMP3	0.443215	12.4	0
IMPACT	0.297734	40.3	3.74242
IMPDH2	0.681503	15.3	0
INA	0.0319131	4.1	Not estimable
INO80	0.0268446	13.9	Not estimable
INO80B	0.0268446	28.3	Not estimable
INPP5F	0.694664	10.1	0.87446
INPP5J	0.686085	1.6	0
INSC	0.691428	1.4	0
INSL3	0.697405	234.1	0
INSM2	0.692062	2.9	0
INSR	0.434987	6.9	0
INSRR	0.442195	4.2	0
INVS	0.697405	12	0
IPO11	0.305243	30.9	0
IPPK	0.0308305	12	Not estimable
IQCB1	0.438019	40.1	0
IQCC	0.436488	26.6	0
IQCE	0.433282	35.3	0
IQCF1	0.301899	47.4	0
IQCG	0.688894	34.2	0
IQCH	0.098226	20.9	0
IQGAP2	0.236687	30.7	0
IQGAP3	0.296992	6.8	3.73208
IQUB	0.437792	35.5	0
IRAK1BP1	1	15.4	1.86742
IRAK2	0.306188	1.7	0
IRAK3	0.430624	5.1	0
IRF2	0.697405	8.4	0
IRF2BPL	0.692289	15.3	0
IRF4	0.697405	1.7	0
IRF7	0.00742434	4	Not estimable
IRGM	0.436531	3.3	0
IRGQ	0.0335961	4.7	Not estimable
ISCA2	0.697405	13.2	0
ISCU	0.693032	29.9	0
ISLR	0.691843	16.3	0
ISOC2	0.0268446	23.3	Not estimable
IST1	0.142794	45.9	7.47607
ITGA10	0.443468	3.4	0
ITGA11	0.68753	3.4	0
ITGA2	0.43414	1.3	0
ITGA3	0.697405	3.9	0
ITGA4	0.687789	1.2	0
ITGA5	0.035339	6.6	Not estimable
ITGA7	0.686548	2.9	0
ITGA9	0.69123	10.2	0
ITGAE	0.691632	1.6	0
ITGB4	0.441636	3.9	0
ITGBL1	0.697405	3.8	0
ITIH5	0.0268446	4	1.24242
ITLN1	0.692062	2.7	0
ITPK1	0.697405	9.4	0
ITPKB	0.697405	3.2	0
ITPR1	0.686667	3	0
ITPR2	0.697405	3.4	0
ITPR3	0.288146	20.1	3.73208
ITPRIP	0.69049	8.4	0
IVD	0.686667	11.2	0
JAG2	0.685749	4.2	0
JAK3	0.697405	1.8	0
JMJD4	0.697405	20.1	0
JMJD7-PLA2G4B	1	2.6	1.86307
JMJD8	0.697405	27.8	0
JOSD2	0.0349449	8.8	Not estimable
JPH2	0.686786	1.5	0
JRK	0.0324082	6.1	Not estimable
KALRN	0.0268446	2.2	Not estimable
KANK4	0.438031	1	0
KAT6A	0.689041	14.1	0
KATNAL2	0.686315	33.2	0
KATNBL1	0.689655	11	0
KAZALD1	0.0268446	1.8	Not estimable
KBTBD3	0.682652	8.1	0
KBTBD4	0.684076	11.6	0
KBTBD7	0.697405	6.9	0
KCNA6	0.685529	2	0
KCNAB1	0.697405	2.7	0
KCNAB3	0.303523	1.7	0
KCNH6	0.686667	1.4	0
KCNIP1	0.443642	5.2	0
KCNK13	0.691038	13.2	0
KCNK18	1	1.7	0.929924
KCNK6	0.0405832	2	3.18359
KCNMB3	0.305536	4.5	0
KCNQ1	0.697405	3.6	0
KCNQ3	0.0268446	1	Not estimable
KCNU1	0.697405	15.8	0
KCTD19	1	57.3	1.86307
KCTD9	0.697405	11.2	0
KDELC2	0.435024	9.5	0
KDELR3	0.295418	4.1	3.74242
KDF1	0.68753	5.8	0
KDM2B	0.697405	9.8	0
KDM4B	0.697405	19.9	0
KDM4C	0.68753	10.4	0
KDM4D	0.697405	37.5	0
KDM4E	1	1.7	1.86307
KDM5B	0.68542	74	0
KDSR	0.684579	10.4	0
KEAP1	0.697405	12.2	0
[truncated: 2,667 more rows]
